# Supplementary material
Source: publisher figshare collection journal article supplement (https://karger.figshare.com/ndownloader/files/16261349)
Supplement: Supplementary file 1 [file 16261349]

Online Supplementary Material. **Independent Listener Analysis Form**

**Box 1. Word transcription**

| **Word** | **Transcription** | **I** | **F** | **Word** | **Transcription** | **I** | **F** |
| --- | --- | --- | --- | --- | --- | --- | --- |
| Pig |  | p | g | Zebra |  | z |  |
| Bird |  | b | d | Sheep |  | ∫ | p |
| Teeth |  | t | θ | Chair |  | t∫ |  |
| Door |  | d |  | Jam |  | dʒ |  |
| Car |  | k |  | Legs |  | l | z |
| Girl |  | g | l | Ring |  | r | ŋ |
| Moon |  | m |  | Watch |  | w | t∫ |
| Knife |  | n | f | yellow |  | j |  |
| Fish |  | f | ∫ | House |  | h | s |
| Van |  | v | n | Five |  |  | v |
| Thumb |  | θ | m | Foot |  |  | t |
| This |  | ð |  | Crab |  |  | b |
| Sock |  | s | k | Orange |  |  | dʒ |

**Box 2. Word Transcription according to initial and final position**

|  | m | p | b | f | v | n | t | d | s | z | ∫ | t∫ | dʒ | ŋ | k | g | h | θ | ð | w | l | r | j |
| --- | --- | --- | --- | --- | --- | --- | --- | --- | --- | --- | --- | --- | --- | --- | --- | --- | --- | --- | --- | --- | --- | --- | --- |
| WI |  |  |  |  |  |  |  |  |  |  |  |  |  |  |  |  |  |  |  |  |  |  |  |
| WF |  |  |  |  |  |  |  |  |  |  |  |  |  |  |  |  |  |  |  |  |  |  |  |

**Box 3. Percent Consonant Correct (PCC) Words (40 targets)**

| Total Targets elicited (attempted production of sound) | /40 |
| --- | --- |
| Total Targets correct using definition |  |

**Box 4. Cleft Speech Characteristics based on Words**

| Nos. Affd. | CSC | Transcribe consonants affected | Nos. Affd. | CSC | **Transcribe consonant affected** |
| --- | --- | --- | --- | --- | --- |
|  | Other |  |  | Pharyngeal articulation |  |
|  | Lateral/Lateralisation |  |  | Glottal articulation./glottal coarticulation |  |
|  | Palatal/Palatalisation |  |  | Active Nasal fricative |  |
|  | Double Oral articulation |  |  | Nasal realisations of plosive/fricatives |  |
|  | Backing to velar/uvular |  |  | Gliding of fricatives/affricates |  |

**Sentence/Phrase Speech Sample**

**/p/** The puppy is playing with a rope/ Puppy has a rope

**/b/** Bob is a baby boy/Bob is a baby

**/f/** The phone fell off the shelf/Phone fell off

**/v/** Dave is driving a van/Dave has a van

**/t/** Tim is putting on a hat on/Tim has a hat

**/d/** Dad mended the door/Dad has a door

**/s/** I saw Sam sitting on a bus/Sam is on the bus

**/z/** The zebra lives at the zoo/Zebra lives at the zoo

**/sh/** Sean is washing a dirty dish/Sean has a dish

**/ch/** Charlie’s watching a football match/Charlie’s at the match

**/ʤ/** John’s got a magic badge/John has a badge

**/k/** Karen is making a cake/Karen has a cake

**/g/** Gary’s got a bag of lego/Gary has a bag

**Box 5. Sentence/Phrase Transcription according to initial and final position**

|  | p | b | f | v | t | d | s | z | ∫ | t∫ | dʒ | k | g |
| --- | --- | --- | --- | --- | --- | --- | --- | --- | --- | --- | --- | --- | --- |
| WI |  |  |  |  |  |  |  |  |  |  |  |  |  |
| WF |  |  |  |  |  |  |  |  |  |  |  |  |  |

**Box 6. Percent Consonant Correct (PCC) Sentences/Phrases (26 targets)**

| Total Targets elicited (attempted production of sound) | /26 |
| --- | --- |
| Total Targets correct using definitions |  |

**Box 7. Cleft Speech Characteristics based on Sentences/Phrases.**

| Nos. Affd. | CSC | Transcribe consonant affected | Nos. Affd. | CSC | Transcribe consonant affected |
| --- | --- | --- | --- | --- | --- |
|  | Other |  |  | Pharyngeal articulation |  |
|  | Lateral/Lateralisation |  |  | Glottal articulation./glottal coarticulation |  |
|  | Palatal/Palatalisation |  |  | Active Nasal fricative |  |
|  | Double Oral articulation |  |  | Weak/nasalization |  |
|  | Backing to velar |  |  | Nasal realisations of plosive/fricatives |  |
|  | Backing to uvular |  |  | Gliding of fricatives/affricates |  |

**Box 8. Phonological processes**

| **Phonological**  **Process** | **Y/N** | **e.g.** |  | **Y/N** | **e.g.** |
| --- | --- | --- | --- | --- | --- |
| Pre-vocalic voicing |  |  | Weak syllable deletion |  |  |
| Word final devoicing |  |  | Gliding of liquids /l r w/ |  |  |
| Final consonant deletion |  |  | Stopping /fsvz/  /sh ge ch/ |  |  |
| Velar fronting |  |  | Atypical |  |  |
| Palatal fronting |  |  | *Key: Y yes; N no* | | |
| Consonant harmony |  |  |
